# Supplementary material for: Facile synthesis and characterization of γ-Al2O3 loaded on reduced graphene oxide for electrochemical reduction of CO2
Source: Royal Society of Chemistry journal article supplement (doi:10.1039/d2se00953f), 2022-01-01
Supplement: d2se00953f1.pdf [file d2se00953f1.pdf]

**Supplementary information for**

**Facile Synthesis and Characterization of  $\gamma$ -Al<sub>2</sub>O<sub>3</sub> Loaded on Reduced Graphene Oxide for Electrochemical Reduction of CO<sub>2</sub>**

Balaji B. Mulik,<sup>a,d</sup> Balasaheb D. Bankar,<sup>b</sup> Ajay V. Munde,<sup>a</sup> Ankush V. Biradar,<sup>b\*</sup> Tewodros Asefa,<sup>e,f\*</sup> and Bhaskar R. Sathe<sup>a,c\*</sup>

<sup>a</sup> *Department of Chemistry, Dr. Babasaheb Ambedkar Marathwada University, Aurangabad 431004, Maharashtra, India*

<sup>b</sup> *Inorganic Material and Catalysis Division, CSIR-Central Salt and Marine Chemicals Research Institute, Bhavnagar 364002, Gujarat, India*

<sup>c</sup> *Department of Nanotechnology, Dr. Babasaheb Ambedkar Marathwada University, Aurangabad 431004, Maharashtra, India*

<sup>d</sup> *University Department of Basic and Applied Science (Chemistry), MGM University, Aurangabad 431003, Maharashtra, India*

<sup>e</sup> *Department of Chemistry and Chemical Biology, Rutgers, The State University of New Jersey, 610 Taylor Road, Piscataway, NJ, 08854, USA*

<sup>f</sup> *Department of Chemical and Biochemical Engineering, Rutgers, The State University of New Jersey, 98 Brett Road, Piscataway, NJ, 08854, USA*

E-mail: [ankush@csmcri.res.in](mailto:ankush@csmcri.res.in); [tasefa@chem.rutgers.edu](mailto:tasefa@chem.rutgers.edu); [bhaskarsathe@gmail.com](mailto:bhaskarsathe@gmail.com)

**Content of Supporting Information**

1. Particle size distribution curve
2. ICP-MS of Al<sub>2</sub>O<sub>3</sub>-rGO nanocomposite materials
3. The equivalence circuit and values of electrochemical resistances at electrified interfaces during CO<sub>2</sub> reduction reactions over various electrocatalysts
4. High pressure liquid chromatography (HPLC) data
5. Bulk electrolysis (i-t) of rGO under CO<sub>2</sub> saturated solution for 3600 sec. at -0.934 V vs RHE and respective FE-39% observed for rGO electrocatalyst
6. Faradaic efficiency (FE), along with error bars, for the formation of formate during of electrocatalytic CO<sub>2</sub> reduction reaction over Al<sub>2</sub>O<sub>3</sub>-rGO hybrid electrocatalyst
7. A table of data comparing the catalytic activities of the materials reported herein with those taken from the literature.

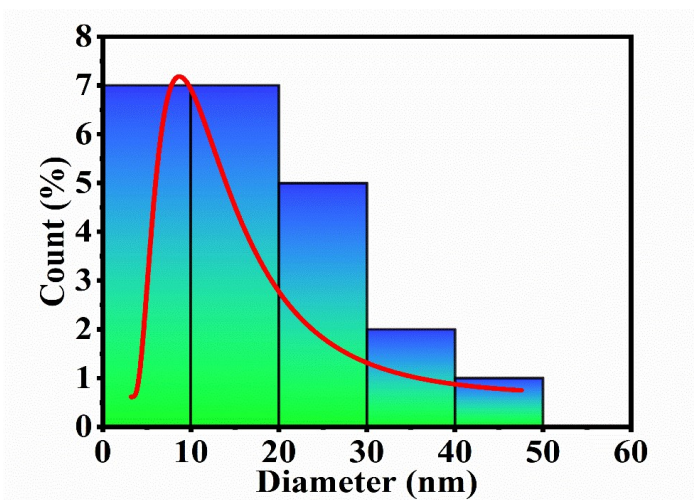

**Figure S1.** Particle size distribution curve for  $\text{Al}_2\text{O}_3$  particles on rGO. The curve demonstrates that the average particle size of  $\text{Al}_2\text{O}_3$  on rGO is in the range of 8 to 12 nm.

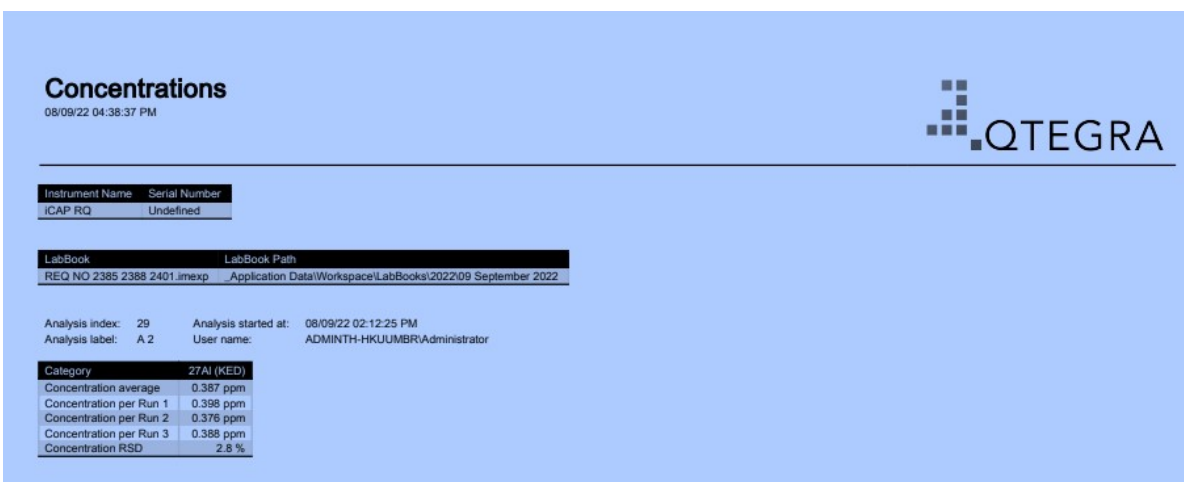

**Figure S2.** The amount of Al in  $\text{Al}_2\text{O}_3$ -rGO nanocomposite materials as determined by ICP-MS. The result shows that the amount of Al on rGO surface is 2.8 wt.%.

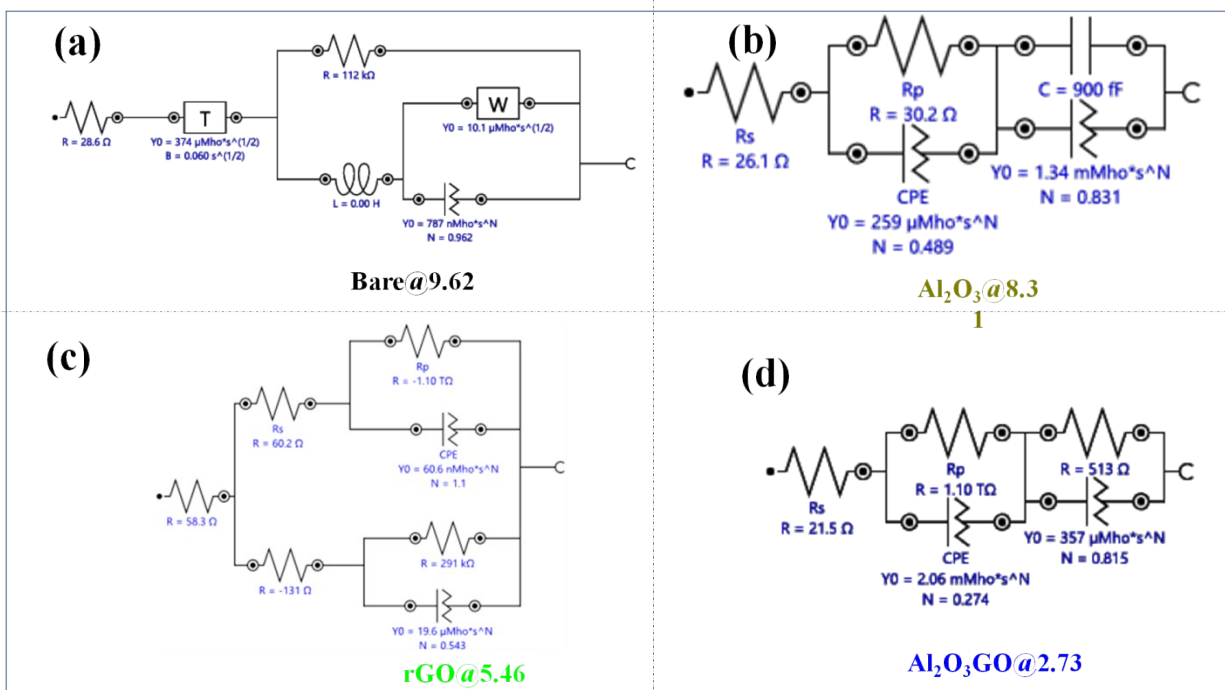

**Figure S3.** The equivalence circuit model corresponding to the impedance spectra and the values of resistances at electrified interfaces during CO<sub>2</sub> reduction reactions over: (a) bare GC electrode, (b) Al<sub>2</sub>O<sub>3</sub> NPs-modified GC electrode, (c) rGO-modified GC electrode and (d) Al<sub>2</sub>O<sub>3</sub>-rGO hybrid nanomaterial-modified GC electrode. The results are obtained using their EIS plots.

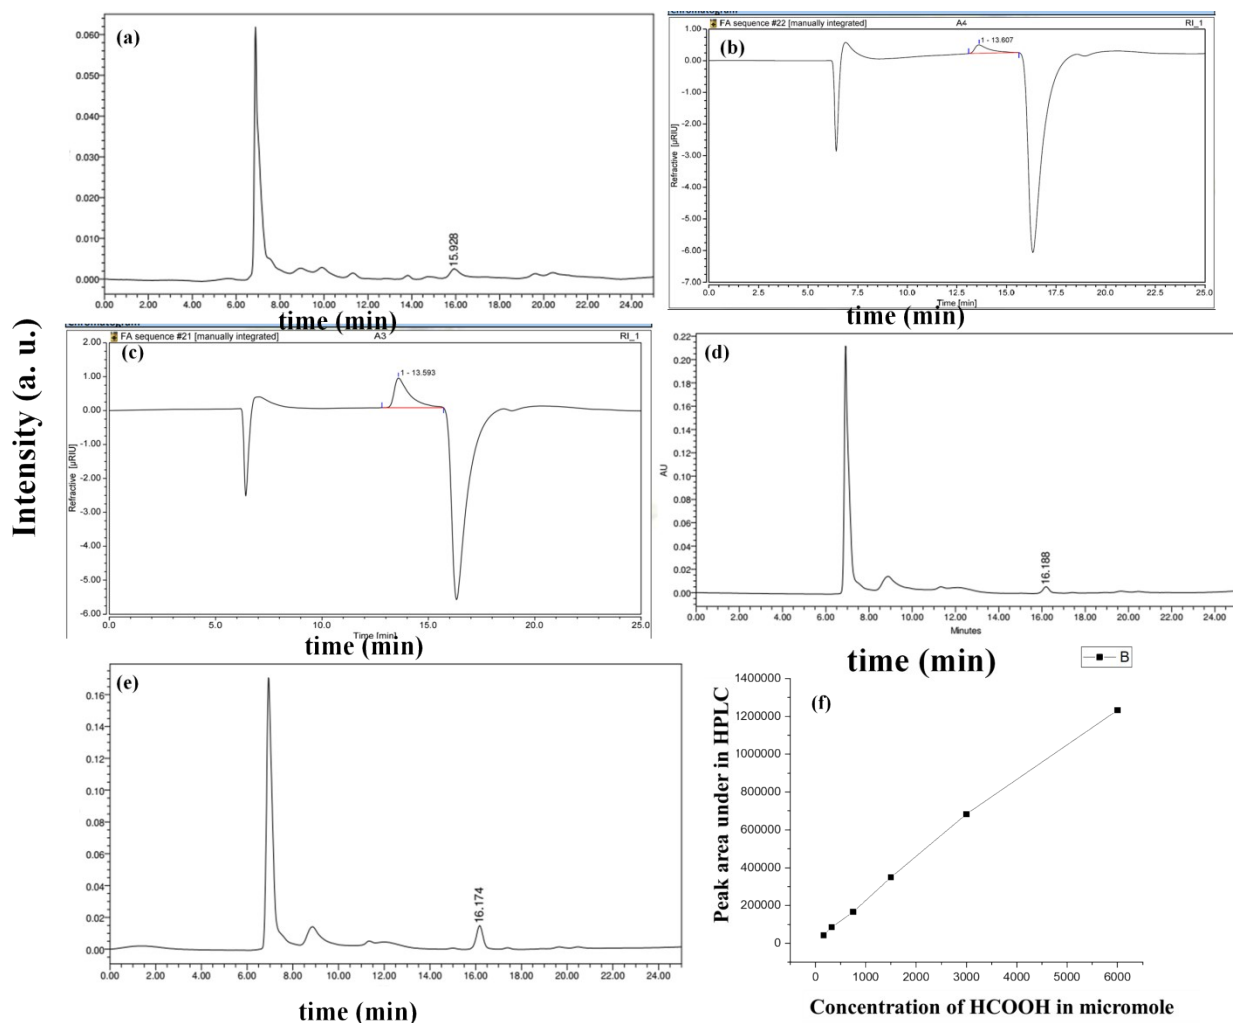

**Figure S4.** HPLC analysis data of the bulk electrolysis products indicating the formation of formate. The results show the products formed from the reactions that are run (a) at a potential of  $-0.434\text{V}$  vs. RHE, showing  $0.01\text{ mM}$  formate; (b) at  $-0.54\text{ V}$  vs. RHE, showing  $0.025\text{ mM}$ ; (c) at  $-0.64\text{ V}$  vs RHE, showing  $0.031\text{mM}$ ; (d)  $-0.734\text{ V}$  vs. RHE, showing  $0.040\text{ mM}$  formate; and (e) at  $-0.934\text{ V}$  vs. RHE, showing  $1.269\text{ mM}$  formate. (f) The standard calibration curve obtained with known amounts of formate is included for comparison with experimental data. In the figures, a.u represents arbitrary unit.

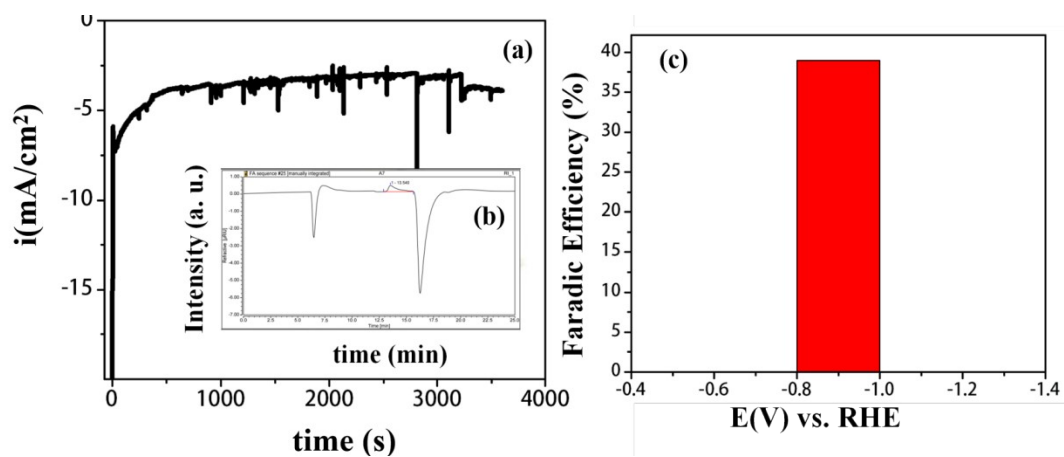

**Figure S5.** Bulk electrolysis (a)  $i$ - $t$  curve for the CO<sub>2</sub>RR over rGO as electrocatalyst in CO<sub>2</sub>-saturated solution for 3600 s at -0.934 V vs RHE. (b) Confirmation of the formation of formate product using HPLC data.(c) The value of FE is obtained to be 39 % for CO<sub>2</sub>RR rGO electrocatalyst in 3600 s at -0.934 V vs RHE,

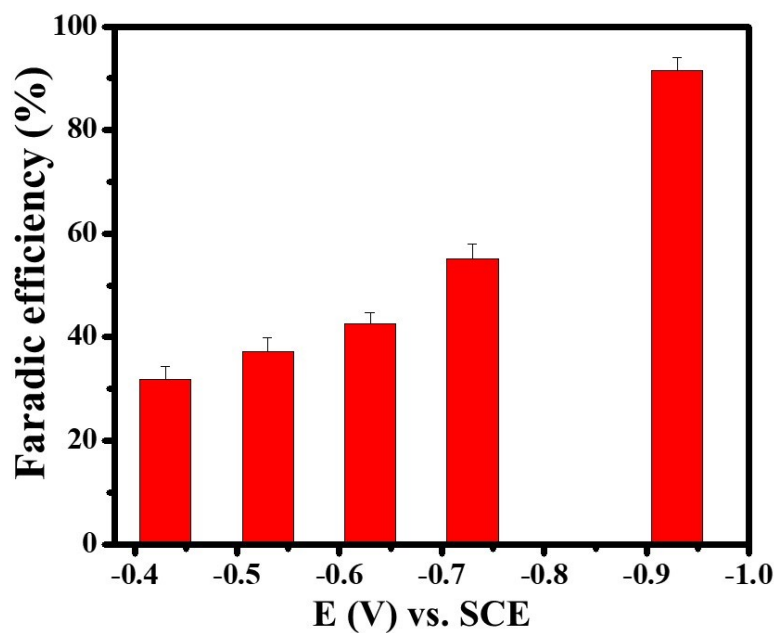

**Figure. S6.** Faradaic Efficiency (FE) values along with error bars for the formation of formate (red rows) as a major product during electrocatalysis of CO<sub>2</sub> reduction reaction over Al<sub>2</sub>O<sub>3</sub>-rGO hybrid electrocatalyst.

**Table S1.** Comparison of the activity of the catalyst reported in the present work with notable electrocatalysts reported in the literature. The electrocatalytic conditions, electrolyte, and potential observed for reduction, Faradic efficiency, references, etc. are also listed.

| Sr. No | Electrocatalytic System                                                         | Electrolyte             | Cathodic Potential  | Faradaic Efficiency (FE %) | Ref.         |
|--------|---------------------------------------------------------------------------------|-------------------------|---------------------|----------------------------|--------------|
| 1.     | Carbon-supported Bi nanoparticles                                               | 0.5 M KHCO <sub>3</sub> | -1.5 V vs. AgCl/Ag  | 93 %                       | 1            |
| 2.     | Carbon black supported SnO <sub>2</sub>                                         | 1.0 M KOH               | -1.43 V vs. RHE     | 80%                        | 2            |
| 3.     | Sn-In bimetallic electrodes.                                                    | 0.1 M KHCO <sub>3</sub> | -1.6 V vs. Ag/AgCl, | 88%                        | 3            |
| 4.     | Copper (I) oxide nanoparticles                                                  | 0.5 M KHCO <sub>3</sub> | -0.8 V vs RHE       | 66%                        | 4            |
| 5.     | Sn-based gas diffusion electrode prepared by Sn on Nafion-bonded carbon black   | 0.5 M KHCO <sub>3</sub> | -0.5 V vs. RHE      | 73.01%                     | 5            |
| 6.     | SnO <sub>2</sub> supported by $\gamma$ -Al <sub>2</sub> O <sub>3</sub>          | 0.1 M KHCO <sub>3</sub> | -0.95 V vs. RHE     | 65 %                       | 6            |
| 7.     | $\gamma$ -Al <sub>2</sub> O <sub>3</sub> decorated reduced graphene oxide (rGO) | 0.5 M KHCO <sub>3</sub> | -0.934 V vs. RHE    | 91.20 %                    | Present Work |

## References

1. B. Avila-Bolivar, L. García-Cruz, V. Montiel, J.Solla-Gullon, *Molecules.*, 2019, **24**, 1-15.
2. H. Xiang, H. A. Miller, M. Bellini, H. Christensen, K. Scott, S. Rasula, H. E.Yu, *Sustain. Energ. Fuels.*, 2020, **4**, 277-284.
3. F. Li, H. Zhang, S. Ji, W. Liu, D. Zhang, C. Zhang, J. Yang, F. Yang, L. Lei, *Int. J. Electrochem. Sci.*, 2019,**14**, 4161-4172.
4. X. Zhu, K. Gupta, M. Bersani, J. A. Darr, P. R. Shearing, D. J. L. Brett, *Electrochimica Acta.*, 2018, **283**, 1037-1044.
5. Q. Wang, X. Wang, C. Wu, *Sci. Rep.*, 2017, **7**, 13711.
6. Y. E. Kim, W. Lee, M. H. Youn, S. K. Jeong, H. J. Kim, J. C. Park K. T. Park, *J. Ind. Eng. Chem.*, 2019, **78**, 73-78.
